# Supplementary material
Source: HighWire-hosted journal article supplement (https://gut.bmj.com/content/69/8/1483)

## Order

## Odds Ratio morbidly obese patients/non-morbidly obese patients

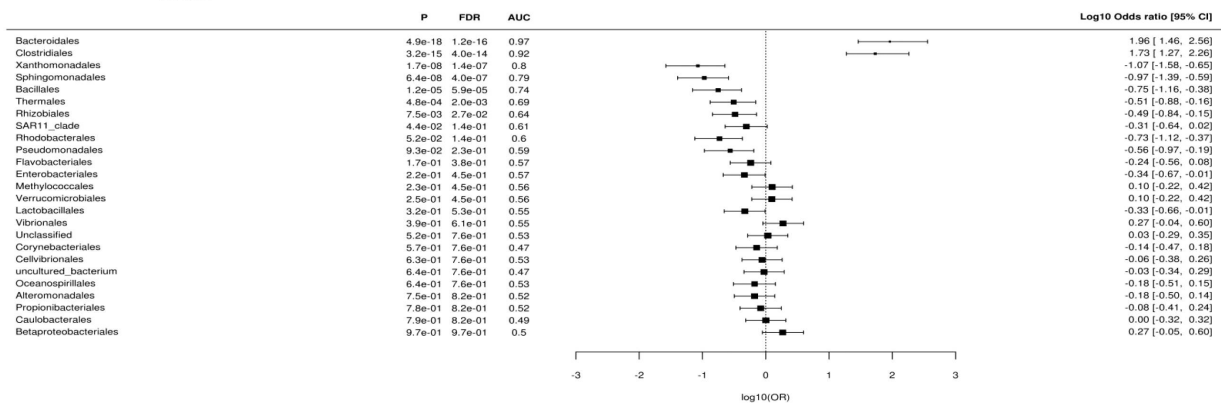

## Family

## Odds Ratio morbidly obese patients/non-morbidly obese patients

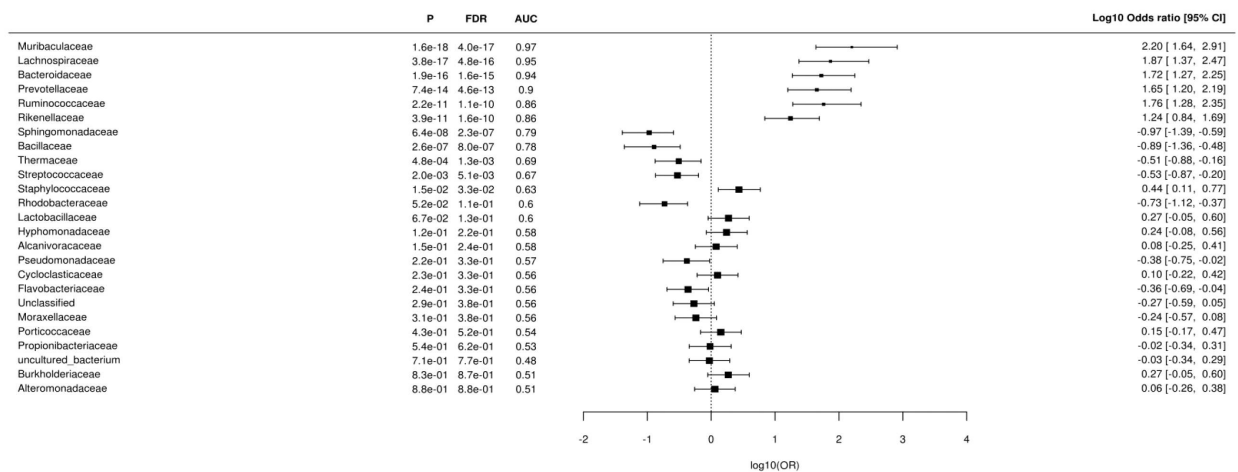

Supplement: inline-supplementary-material-5 [file inline-supplementary-material-5.pdf]
