# Supplementary material
Source: HighWire-hosted journal article supplement (https://gut.bmj.com/content/69/8/1483)

NAFLD-non-morbidly obese patients

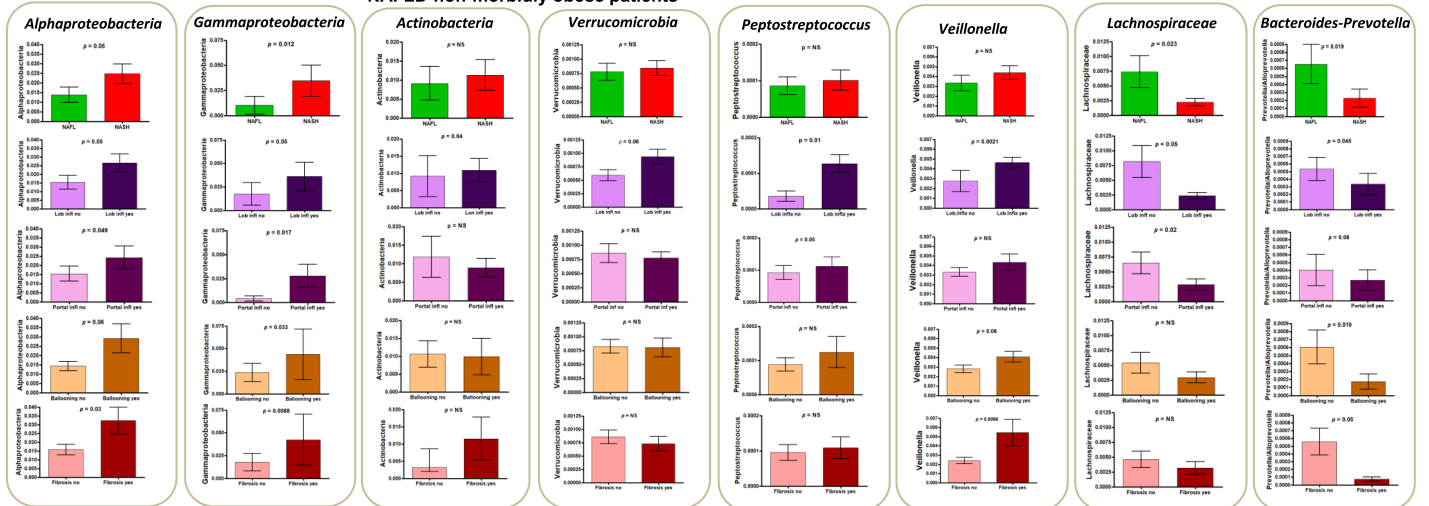

Supplement: inline-supplementary-material-10 [file inline-supplementary-material-10.pdf]

Necrotic colonic polyp was used as positive control tissue of LPS immunostaining by IHQ

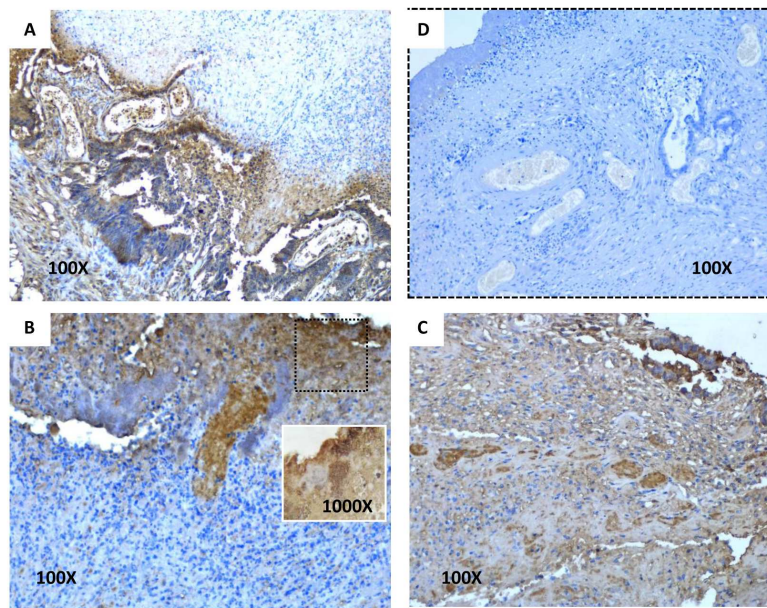

Supplement: inline-supplementary-material-11 [file inline-supplementary-material-11.pdf]

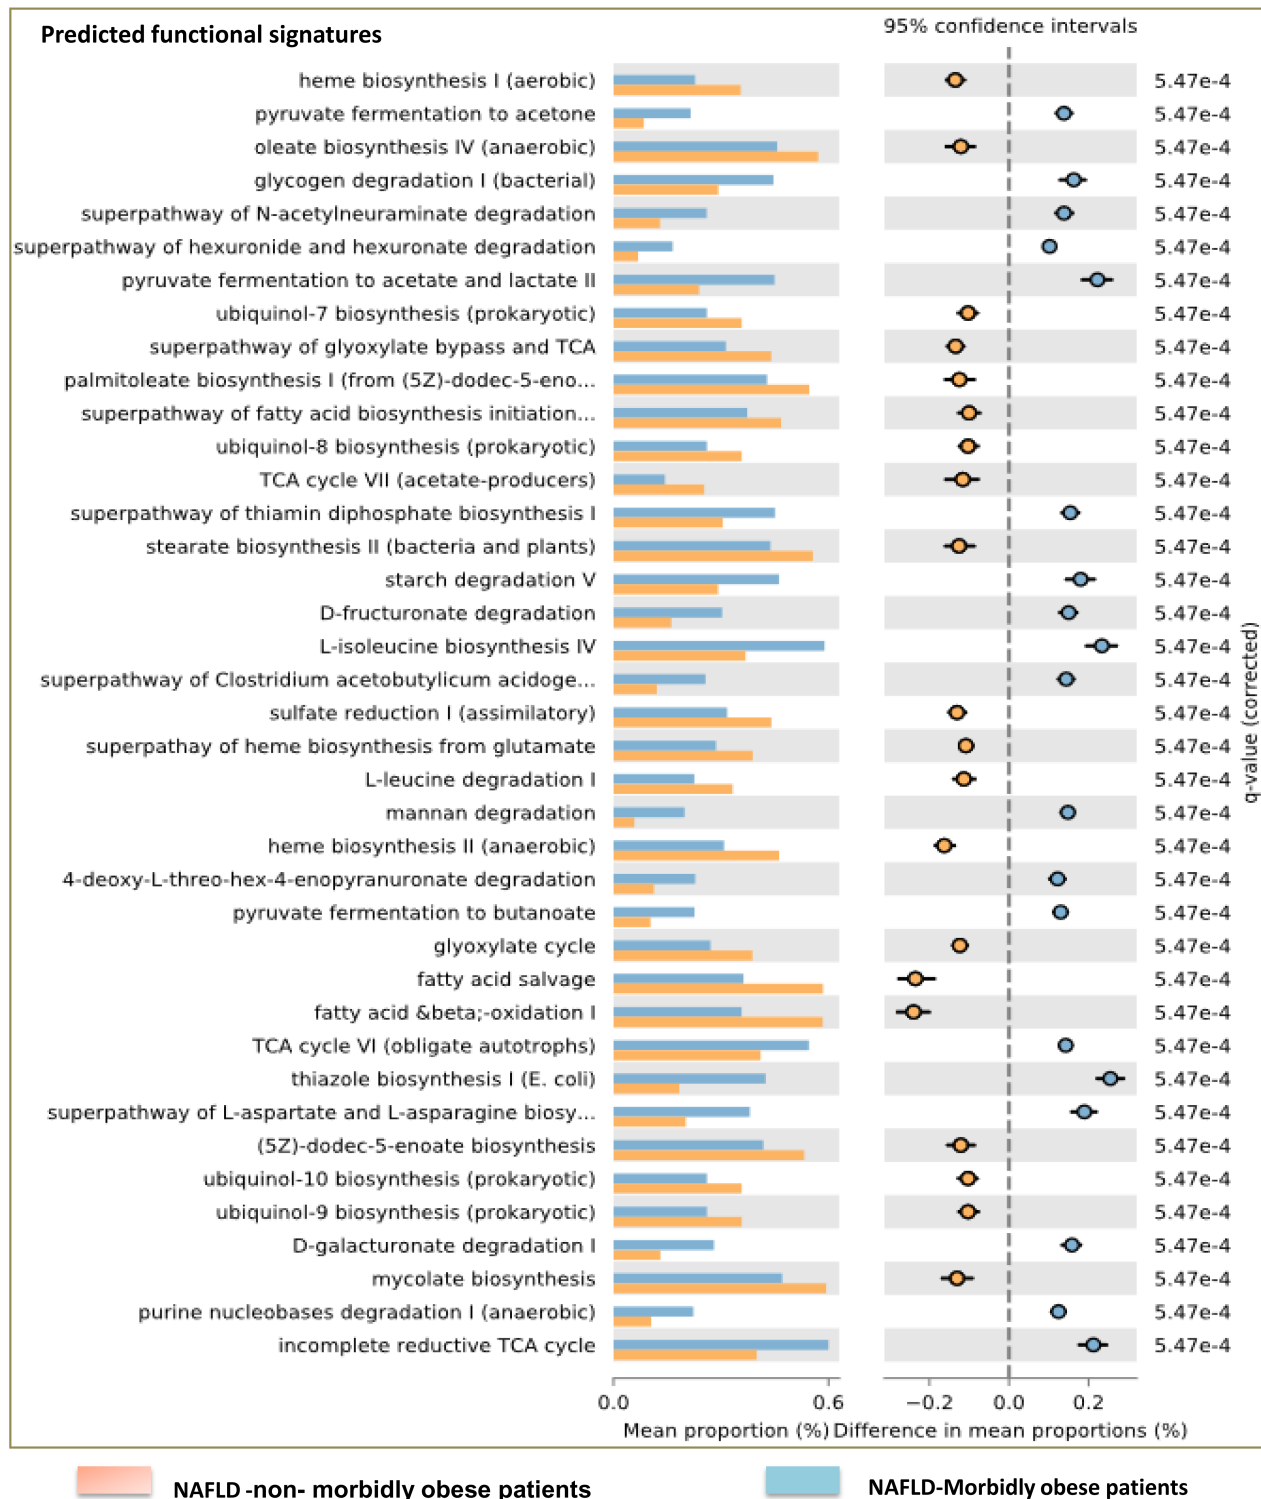

Supplement: inline-supplementary-material-13 [file inline-supplementary-material-13.pdf]

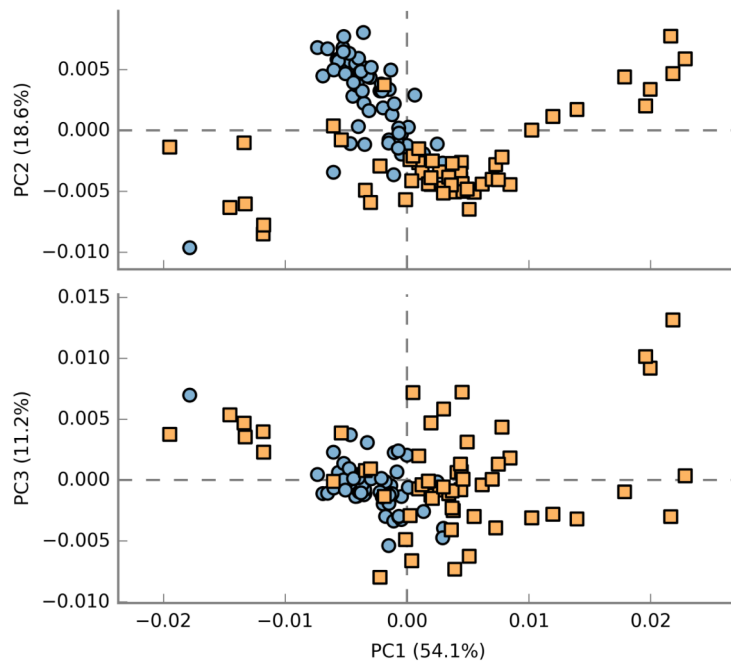

   
NAFLD-morbidly obese patients    NAFLD-Non-morbidly obese patients

Supplement: inline-supplementary-material-14 [file inline-supplementary-material-14.pdf]

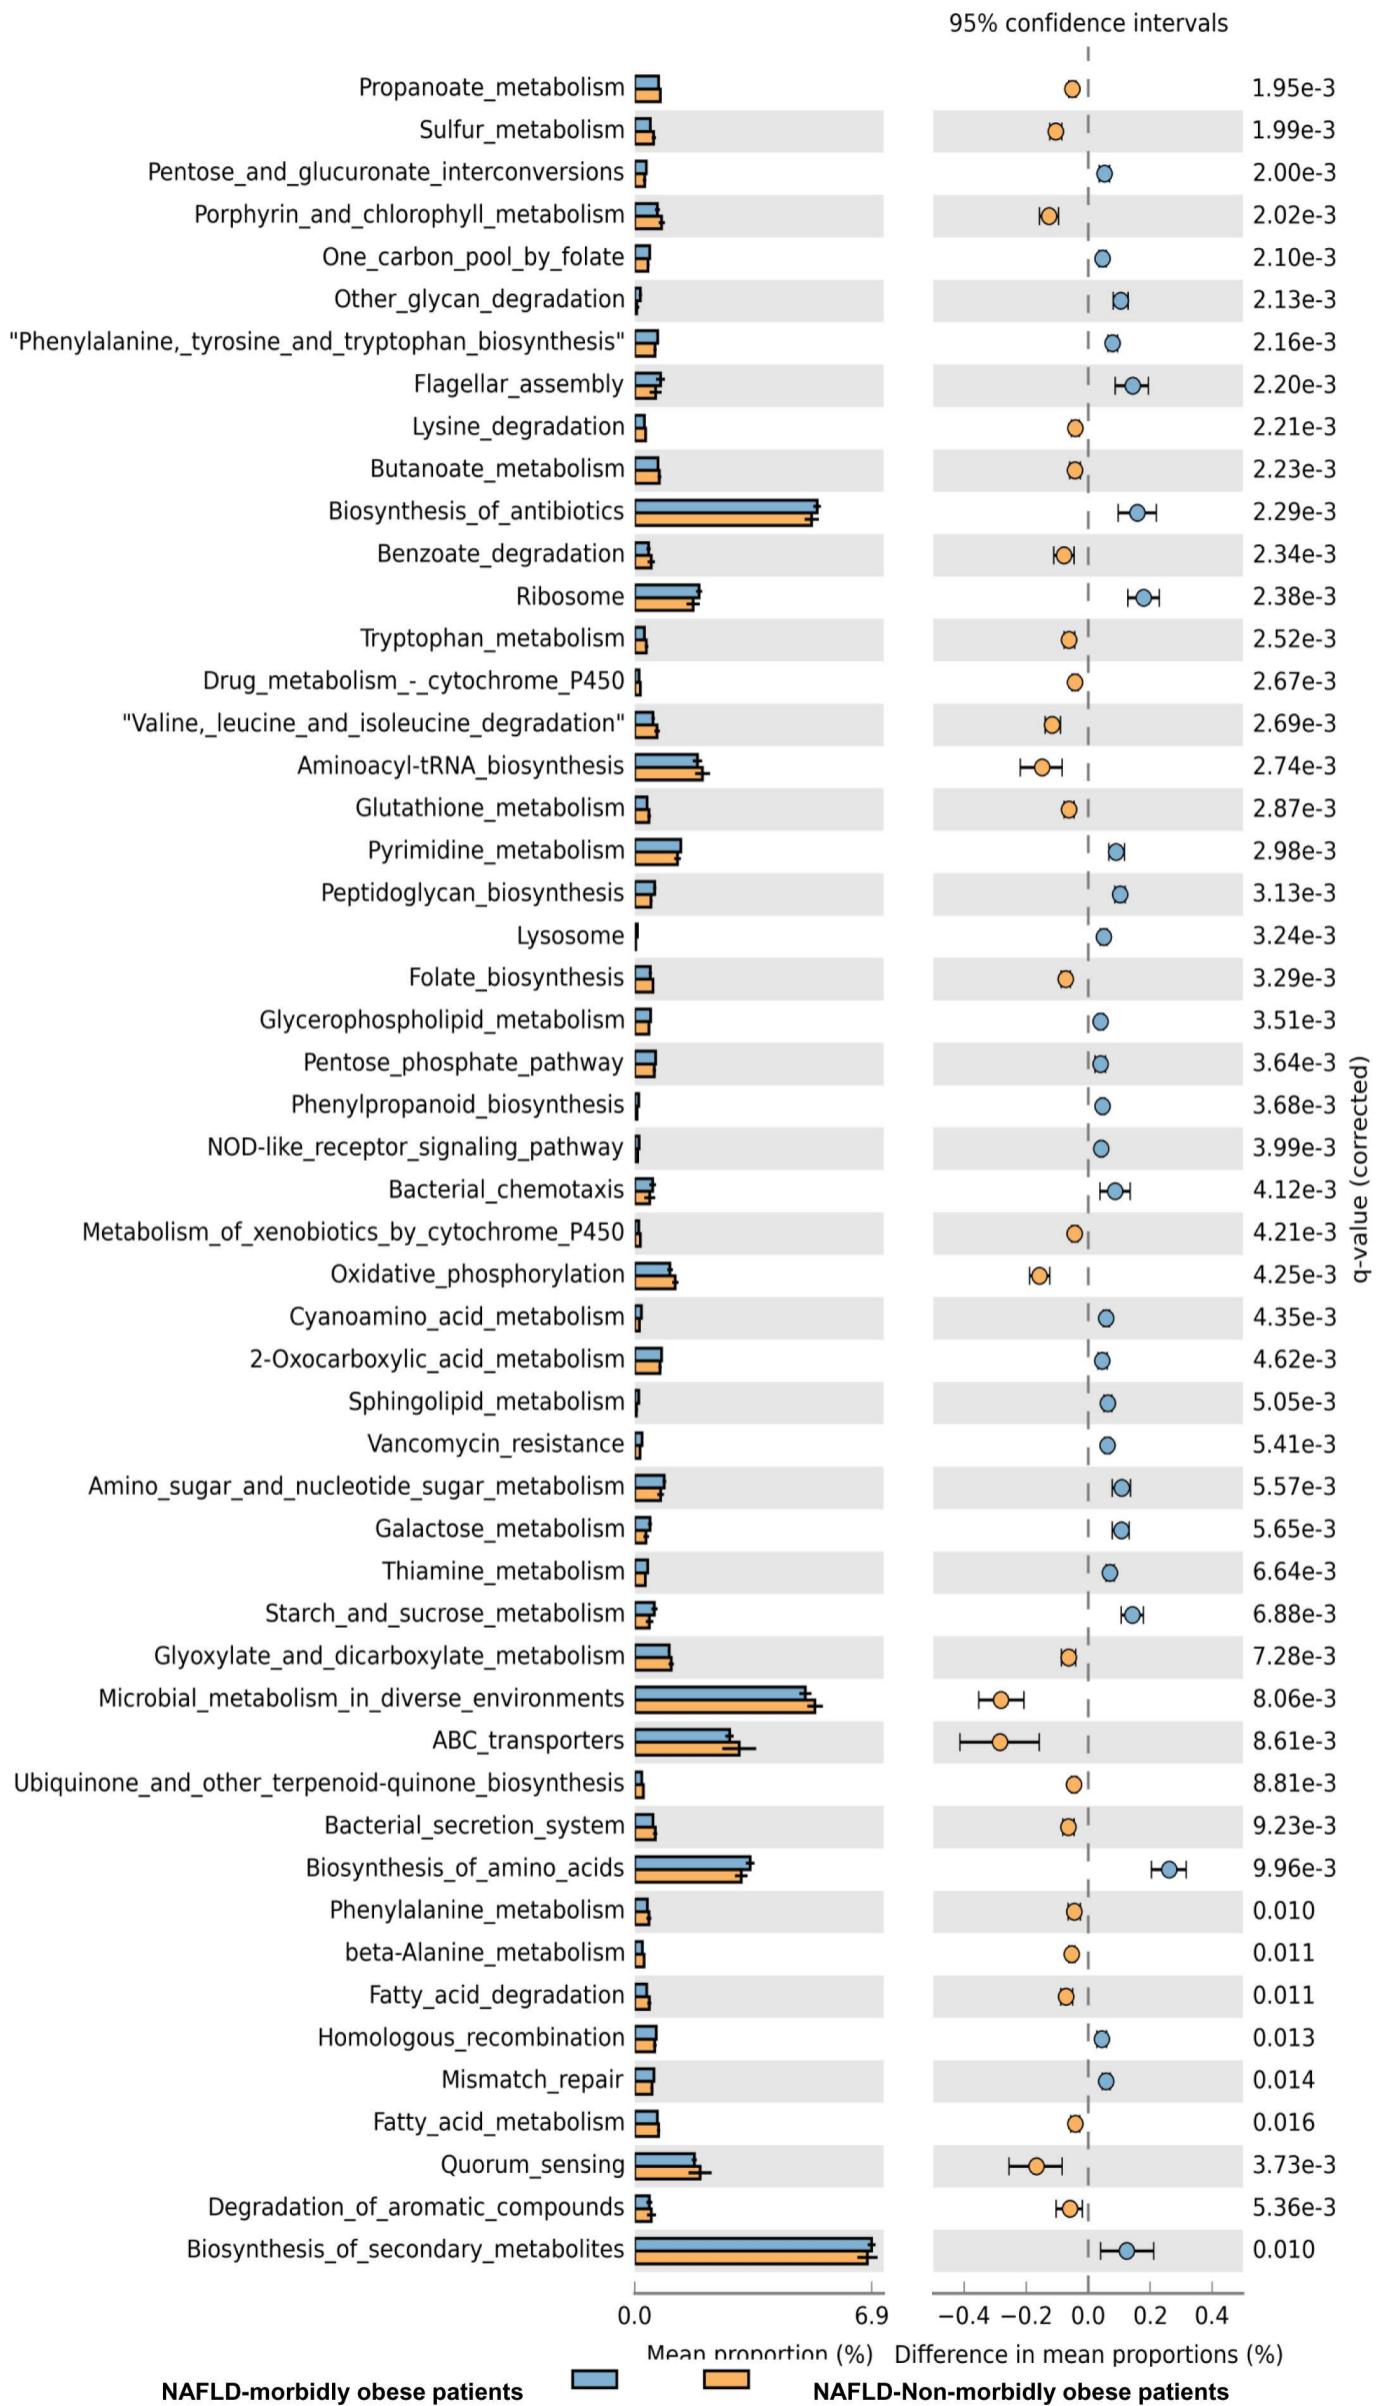

Supplement: inline-supplementary-material-15 [file inline-supplementary-material-15.pdf]

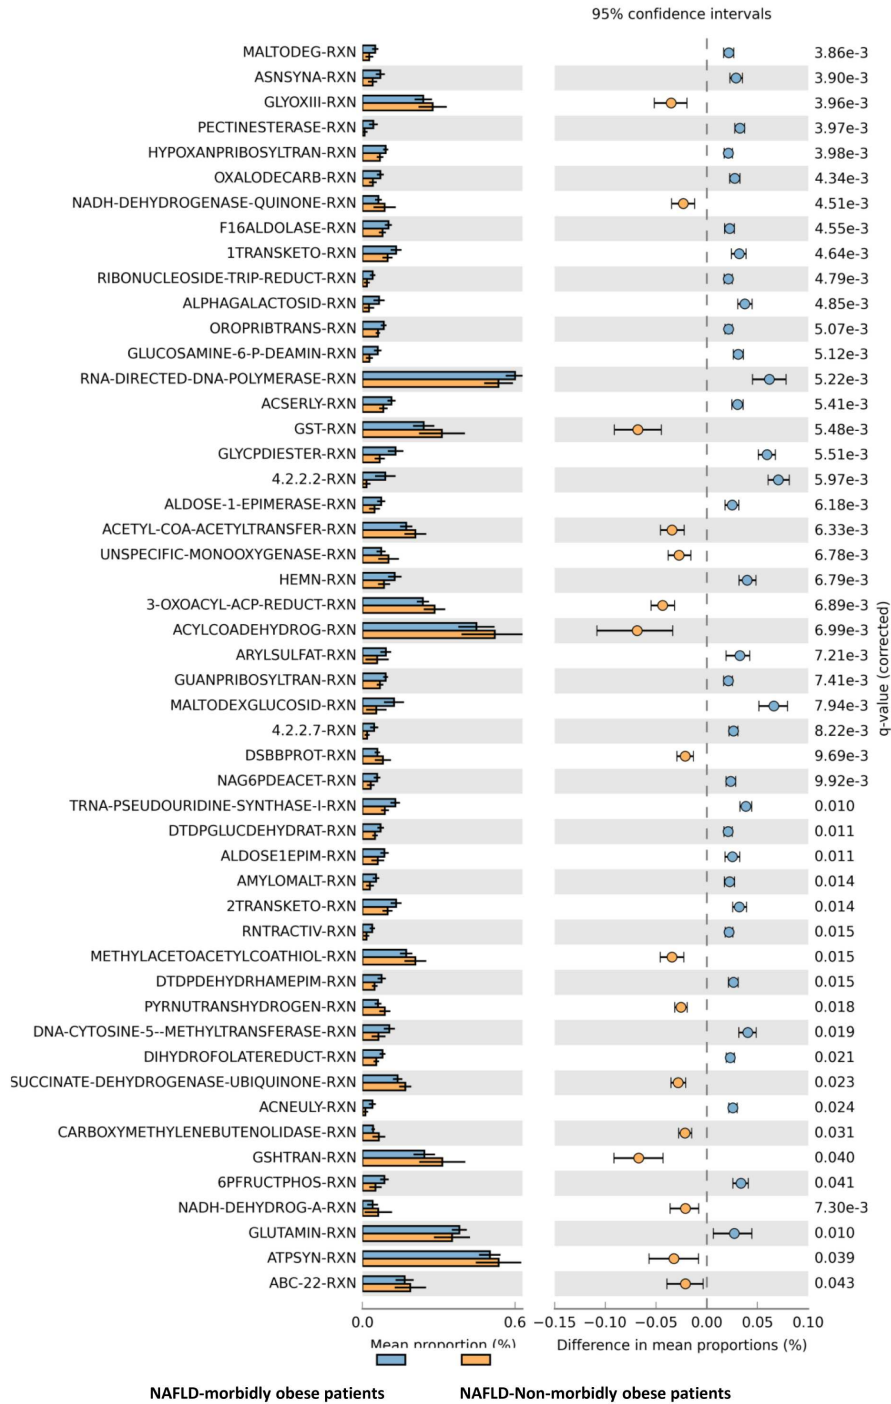

Supplement: inline-supplementary-material-16 [file inline-supplementary-material-16.pdf]

## NGS Library QC : metagenome amplicon

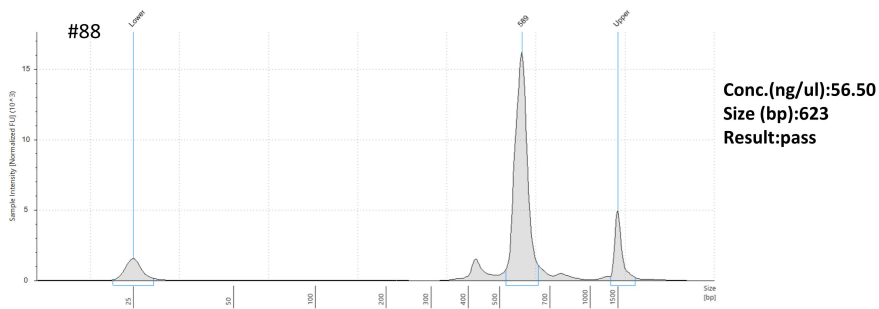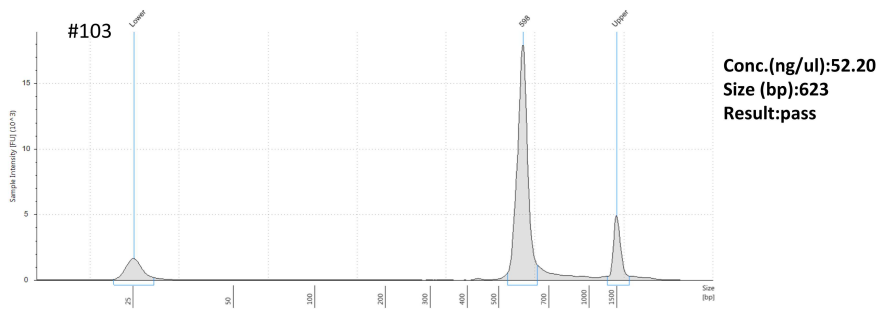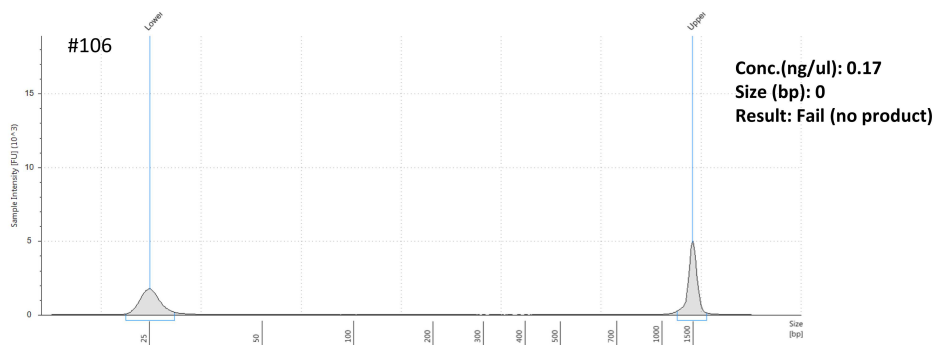

Supplement: inline-supplementary-material-2 [file inline-supplementary-material-2.pdf]

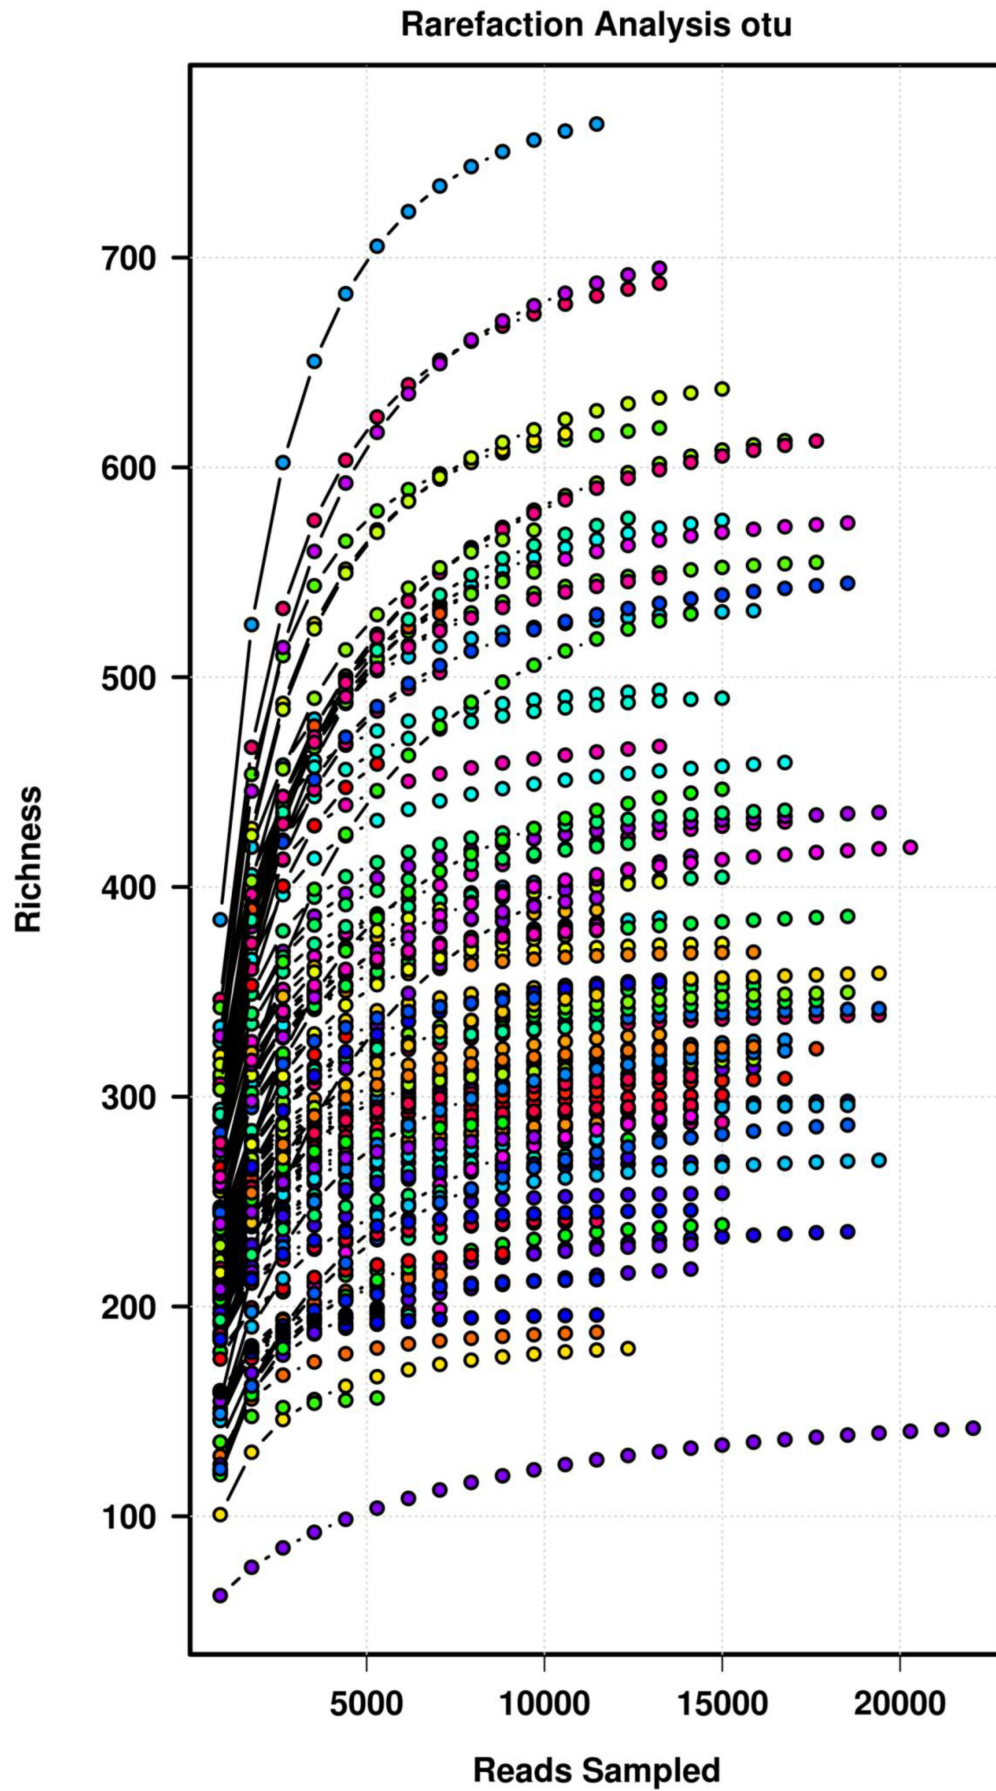

Supplement: inline-supplementary-material-3 [file inline-supplementary-material-3.pdf]

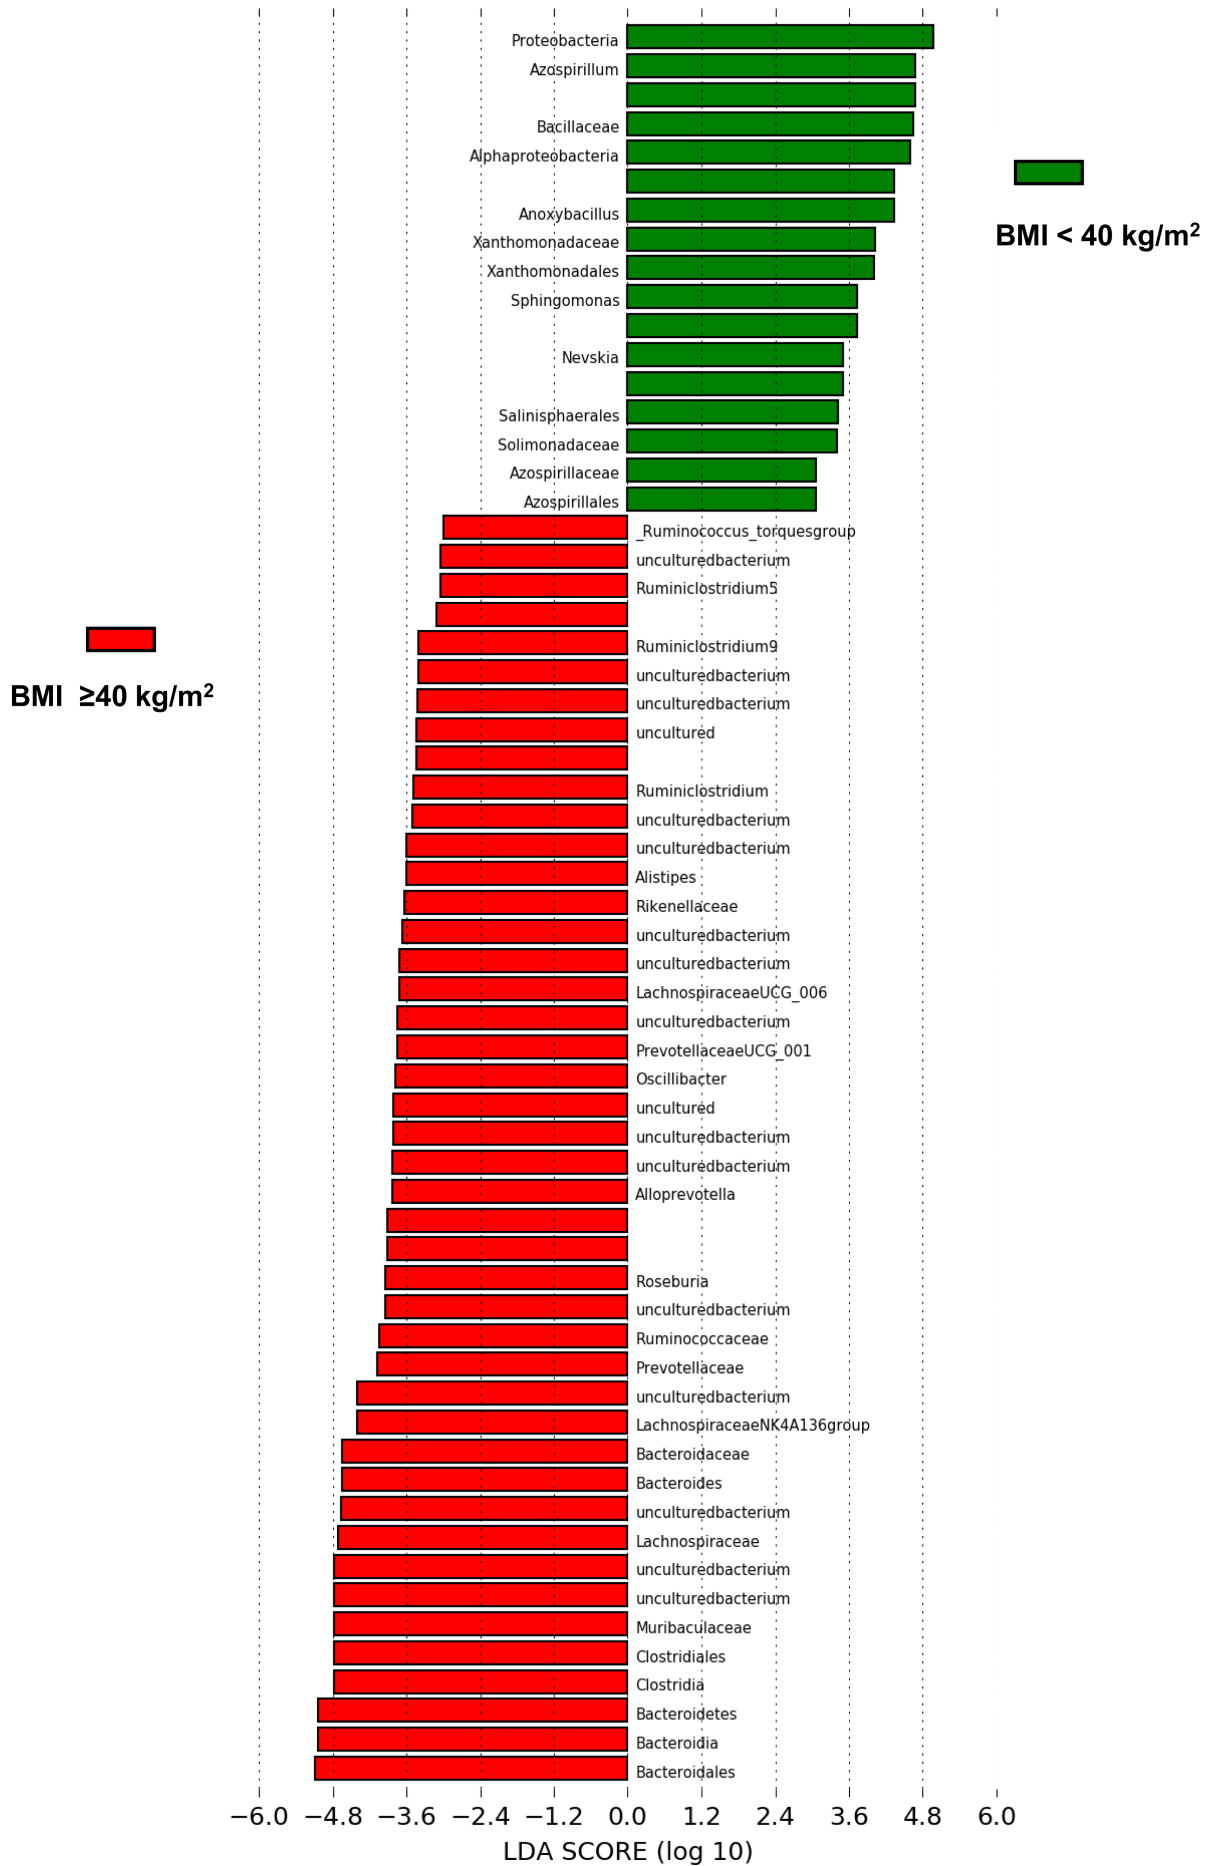

Supplement: inline-supplementary-material-6 [file inline-supplementary-material-6.pdf]

**A** Universal primers  
16S rRNA-qPCR  
region coverage

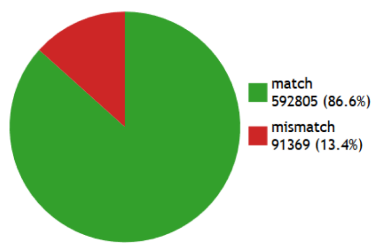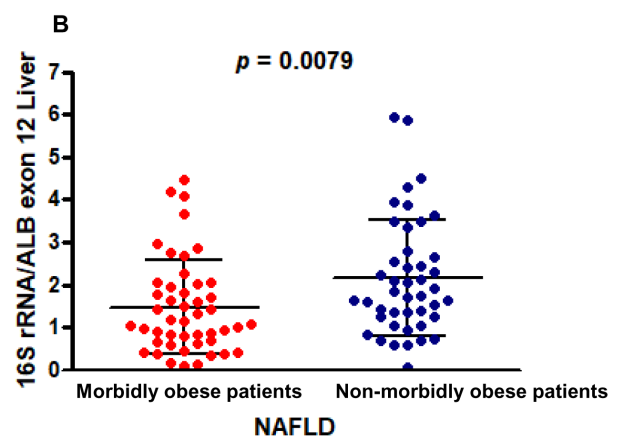

**C**

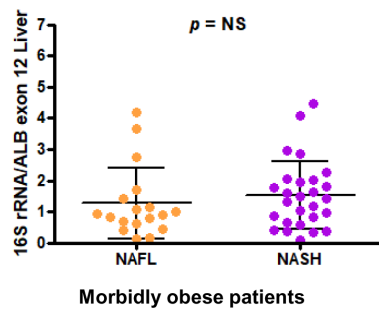

**D**

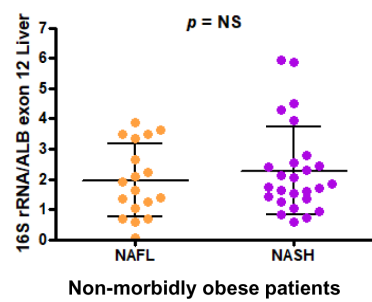

Supplement: inline-supplementary-material-7 [file inline-supplementary-material-7.pdf]

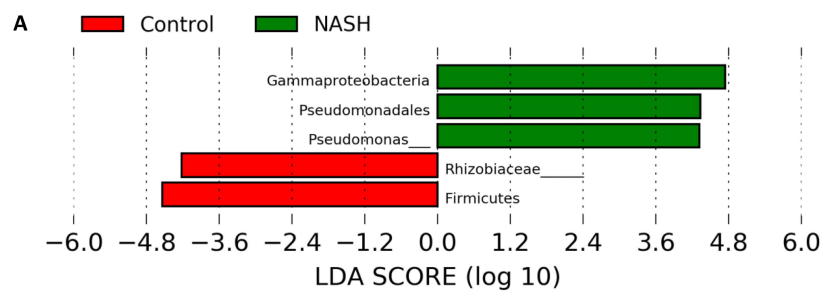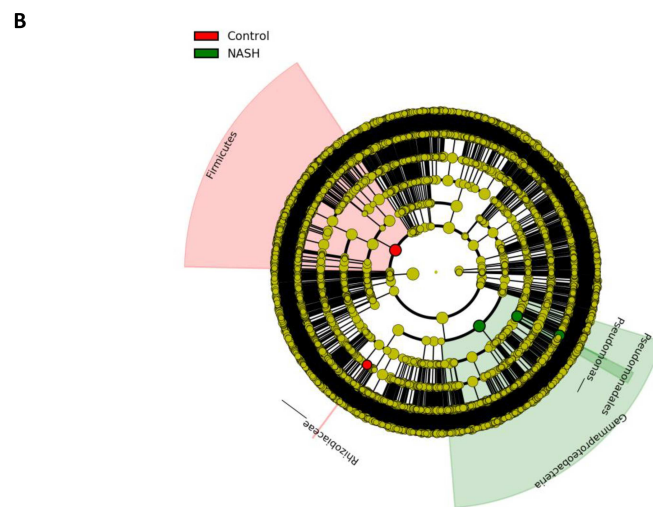

Supplement: inline-supplementary-material-8 [file inline-supplementary-material-8.pdf]

NAFLD- morbidly obese patients

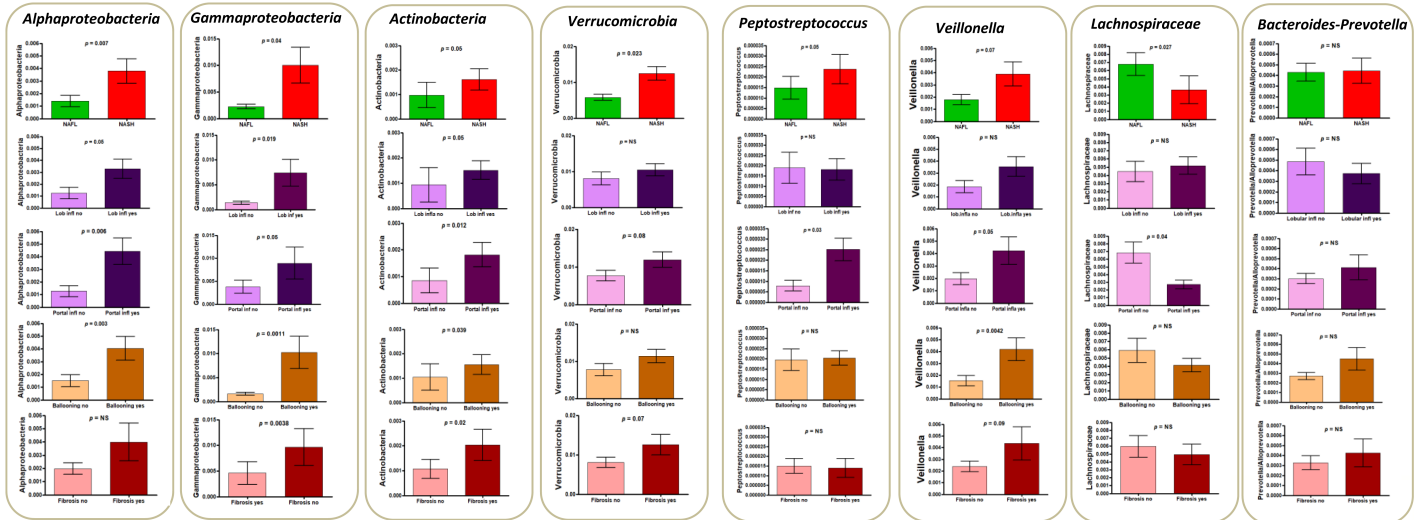

Supplement: inline-supplementary-material-9 [file inline-supplementary-material-9.pdf]
